# Supplementary material for: Government Actions and Their Relation to Resilience in Healthcare During the COVID-19 Pandemic in New South Wales, Australia and Ontario, Canada
Source: PubMed Central journal article supplement (PMC9808212; doi:10.34172/ijhpm.2021.67), 2021-07-06
Supplement: ijhpm-11-1682-s002.pdf [file ijhpm-11-1682-s002.pdf]

**Article title:** Government Actions and Their Relation to Resilience in Healthcare During the COVID-19 Pandemic in New South Wales, Australia and Ontario, Canada

**Journal name:** International Journal of Health Policy and Management (IJHPM)

**Authors' information:** Andrew Smaggus<sup>1\*</sup>, Janet C. Long<sup>2</sup>, Louise A. Ellis<sup>2</sup>, Robyn Clay-Williams<sup>2</sup>, Jeffrey Braithwaite<sup>2</sup>

<sup>1</sup>Queen's University, Kingston, ON, Canada.

<sup>2</sup>Australian Institute of Health Innovation, Macquarie University, Sydney, NSW, Australia.

(\*Corresponding author: [71acs@queensu.ca](mailto:71acs@queensu.ca))

**Supplementary file 2.** Trends in COVID-19 Cases and Deaths Due to COVID-19 in NSW and Ontario During the Study Period

a) Cumulative number of cases of COVID-19 reported in New South Wales and Ontario from December 1, 2019 to August 31, 2020

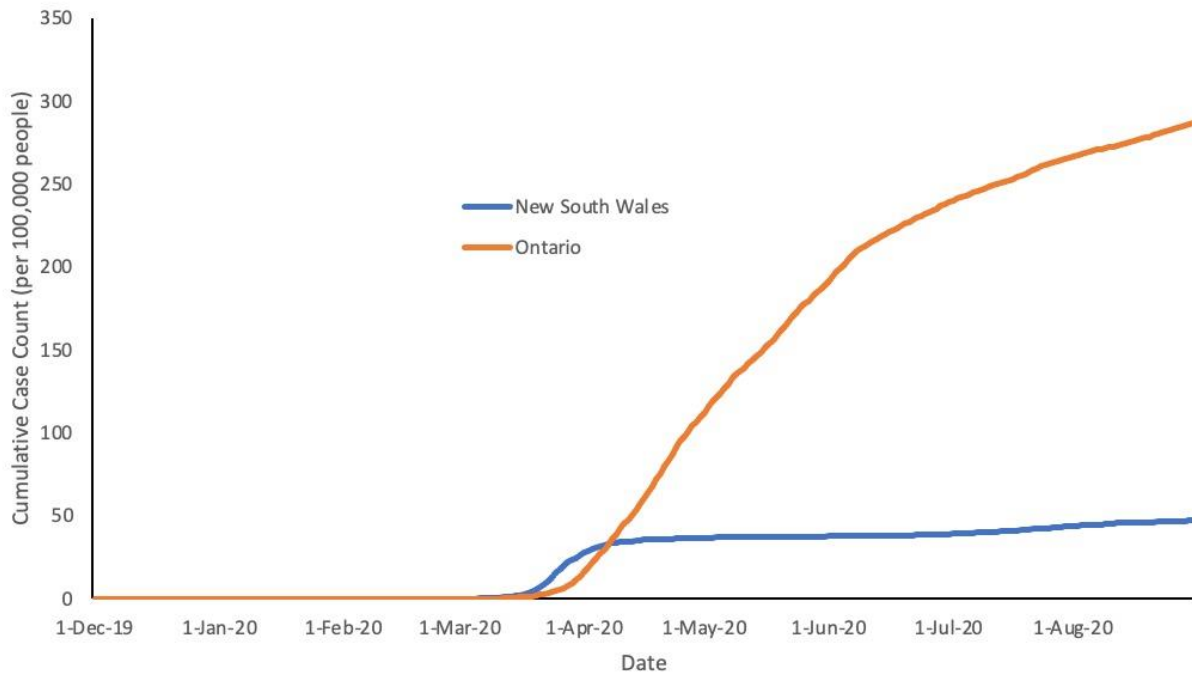

Note: Data obtained from COVID-19 data released by the New South Wales Government,<sup>71</sup> New South Wales Health,<sup>72</sup> and the Government of Ontario.<sup>67</sup> Per capita calculations performed using population data from the Australian Bureau of Statistics<sup>56</sup> and Statistics Canada.<sup>57</sup>

b) Cumulative number of cases of COVID-19 reported in New South Wales and Ontario from December 1, 2019 to August 31, 2020

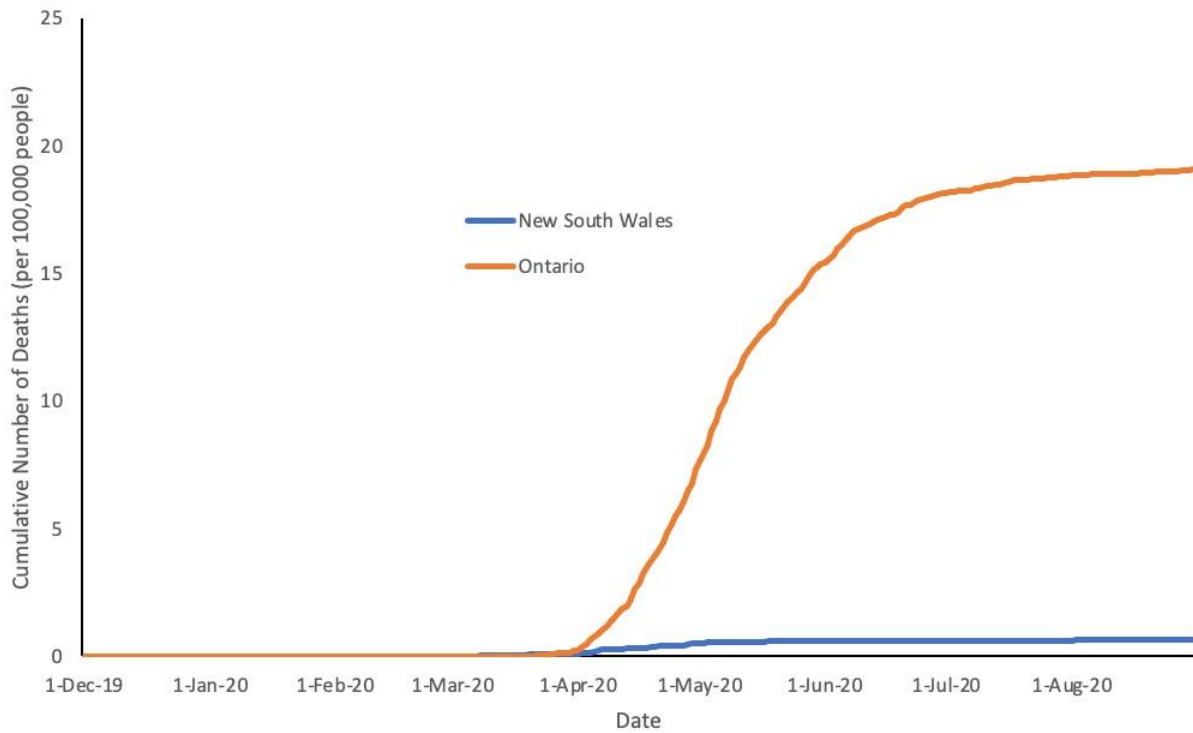

Note: Data obtained from COVID-19 data released by the New South Wales Government,<sup>71</sup> New South Wales Health,<sup>72</sup> and the Government of Ontario.<sup>67</sup> Per capita calculations performed using population data from the Australian Bureau of Statistics<sup>56</sup> and Statistics Canada.<sup>57</sup>
