# Supplementary material for: Government Actions and Their Relation to Resilience in Healthcare During the COVID-19 Pandemic in New South Wales, Australia and Ontario, Canada
Source: PubMed Central journal article supplement (PMC9808212; doi:10.34172/ijhpm.2021.67), 2021-07-06

**Article title:** Government Actions and Their Relation to Resilience in Healthcare During the COVID-19 Pandemic in New South Wales, Australia and Ontario, Canada

**Journal name:** International Journal of Health Policy and Management (IJHPM)

**Authors' information:** Andrew Smaggus<sup>1\*</sup>, Janet C. Long<sup>2</sup>, Louise A. Ellis<sup>2</sup>, Robyn Clay-Williams<sup>2</sup>, Jeffrey Braithwaite<sup>2</sup>

<sup>1</sup>Queen's University, Kingston, ON, Canada.

<sup>2</sup>Australian Institute of Health Innovation, Macquarie University, Sydney, NSW, Australia.

(\*Corresponding author: [71acs@queensu.ca](mailto:71acs@queensu.ca))

**Supplementary file 3.** Organization of the Governments of NSW and Ontario

a) Departments and ministries of the New South Wales Government

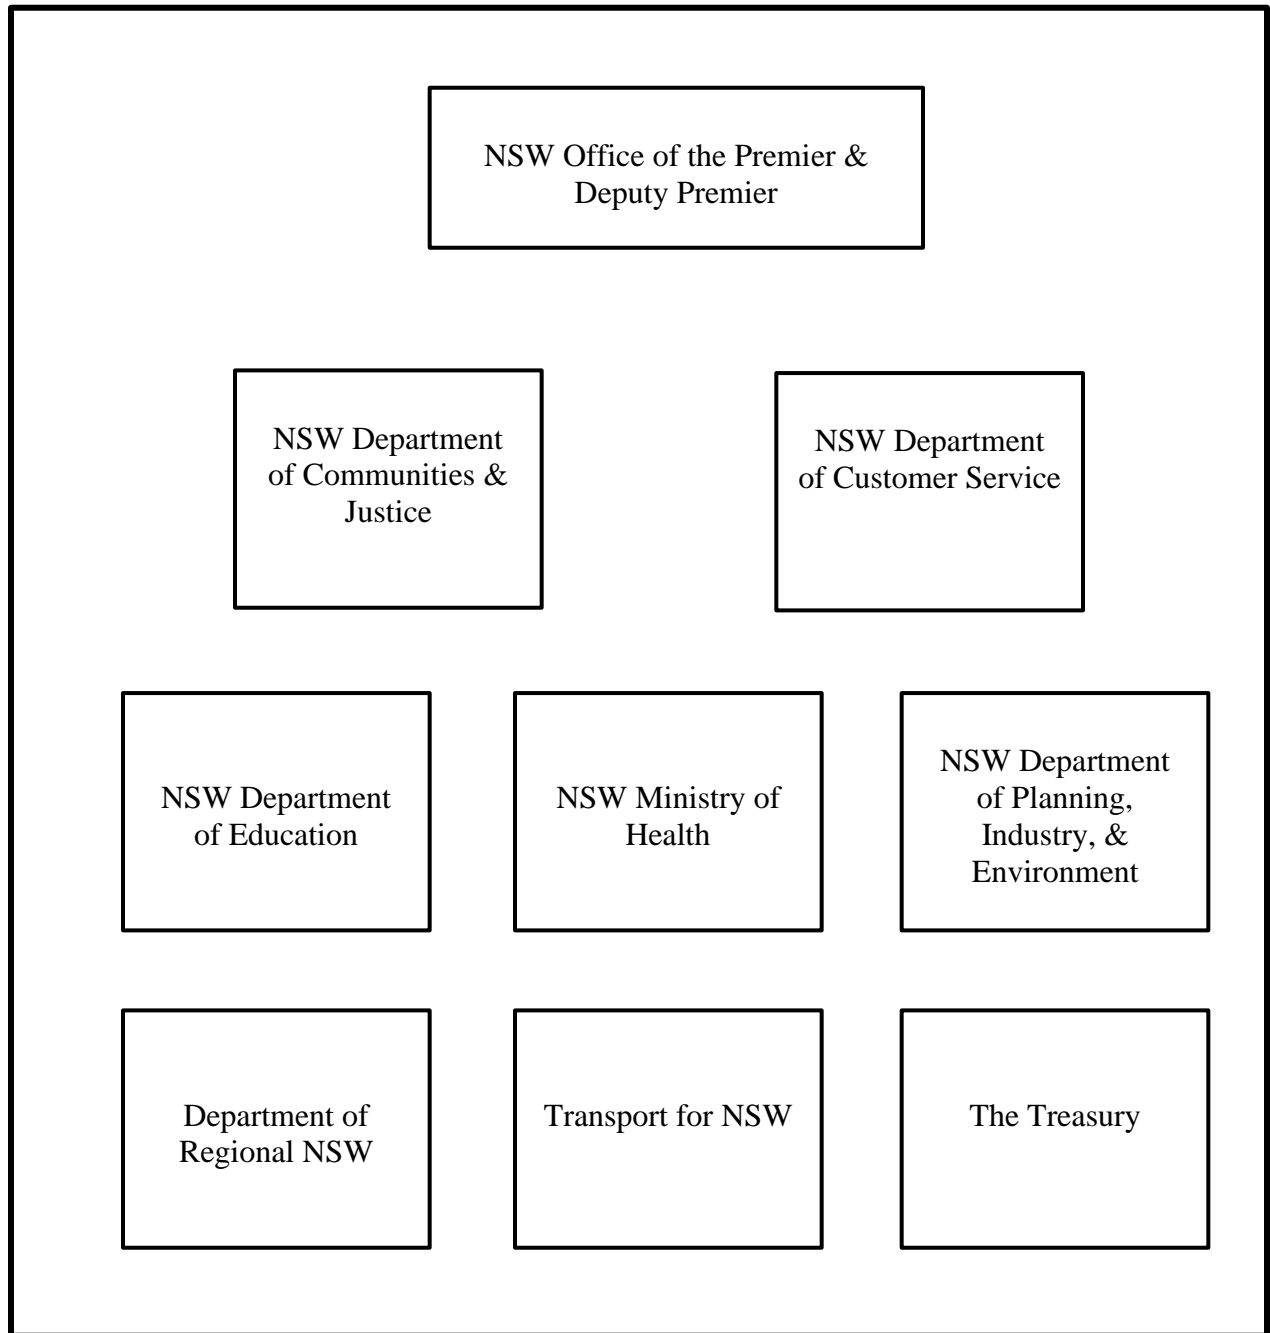

Abbreviation: NSW, New South Wales.

b) Departments and ministries of the Government of Ontario

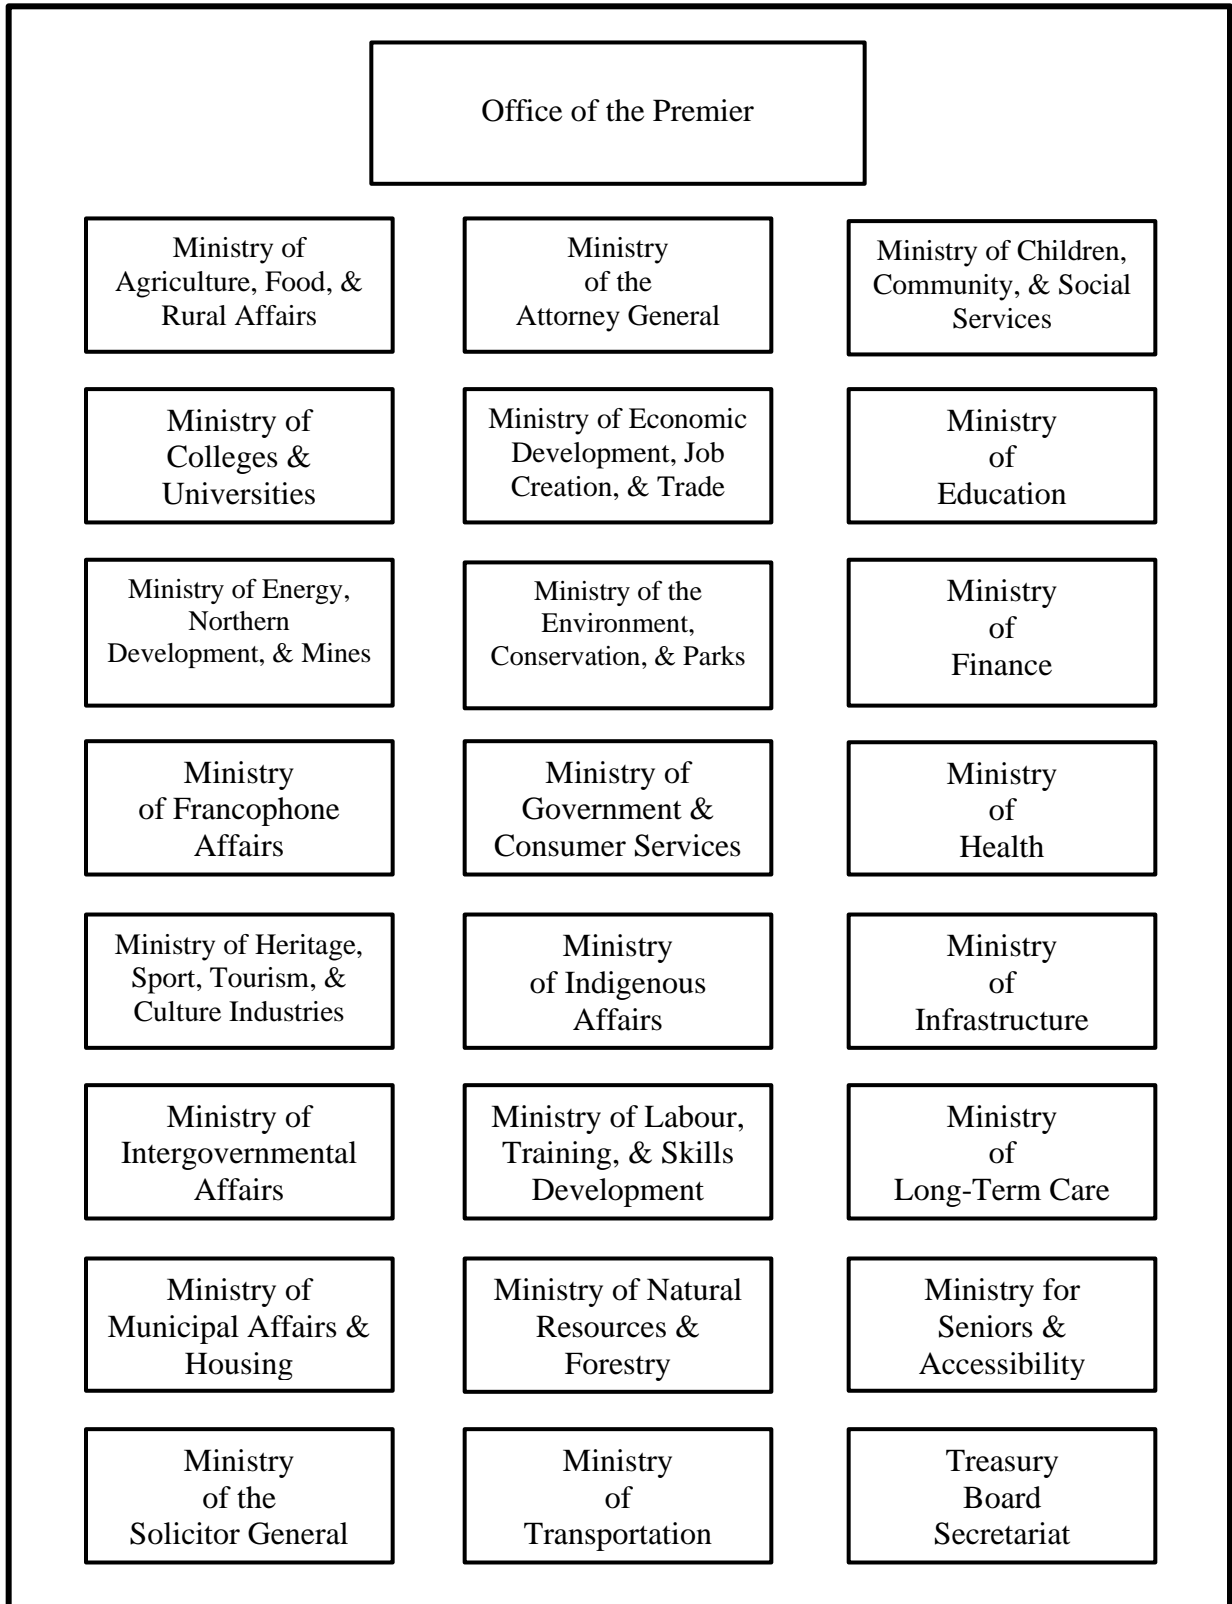

Supplement: ijhpm-11-1682-s003.pdf [file ijhpm-11-1682-s003.pdf]
